# Supplementary material for: The landscape of immune checkpoint-related long non-coding RNAs core regulatory circuitry reveals implications for immunoregulation and immunotherapy responses
Source: PubMed Central journal article supplement (PMC10940638; doi:10.1038/s42003-024-06004-z), 2024-03-14
Supplement: 42003_2024_6004_MOESM1_ESM.pdf [file 42003_2024_6004_MOESM1_ESM.pdf]

## Supplementary Figure 1

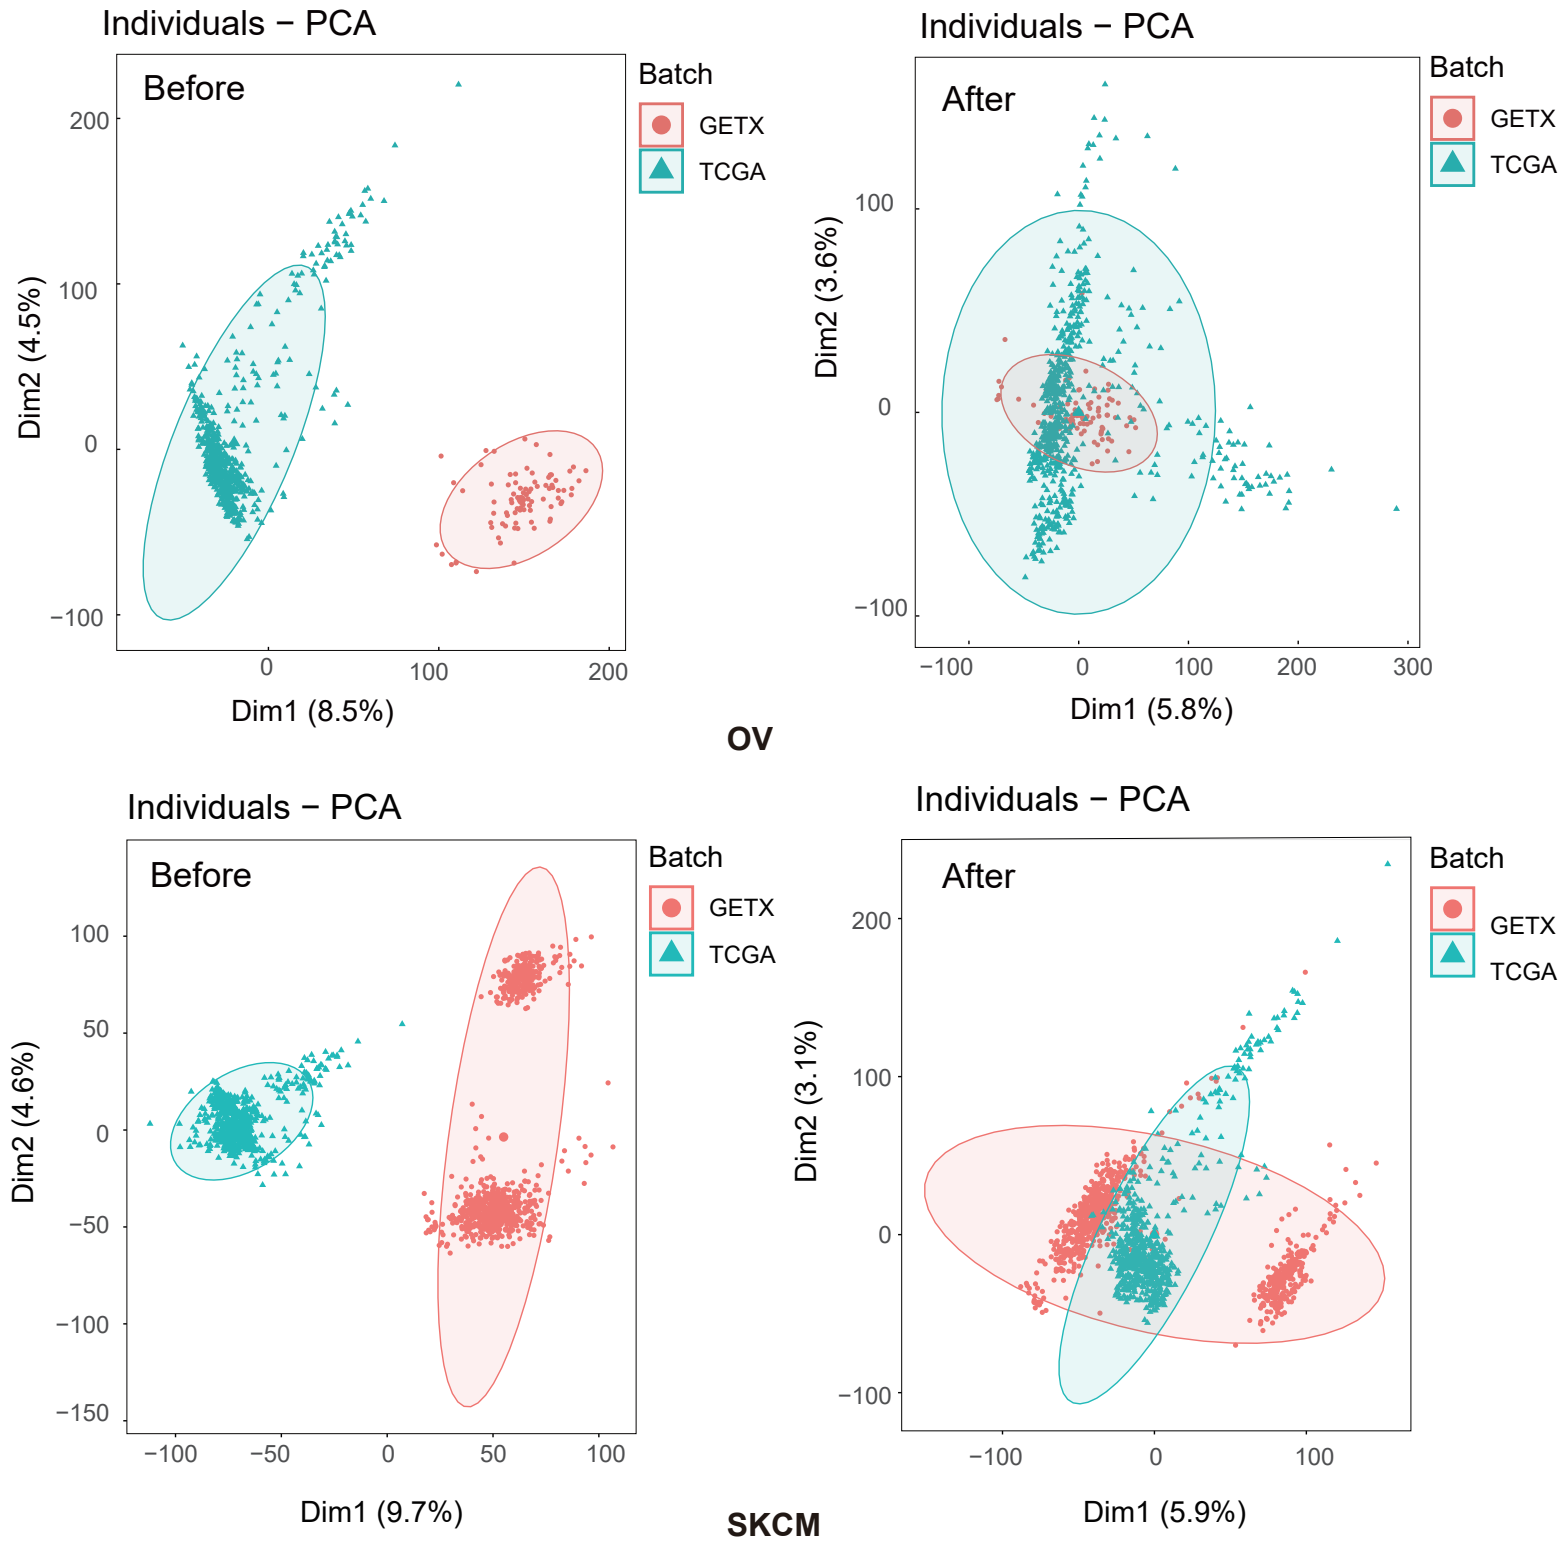

**Supplementary Figure 1.** Two cancers, OV and SKCM, are combined with GETX for batch removal.

## Supplementary Figure 2

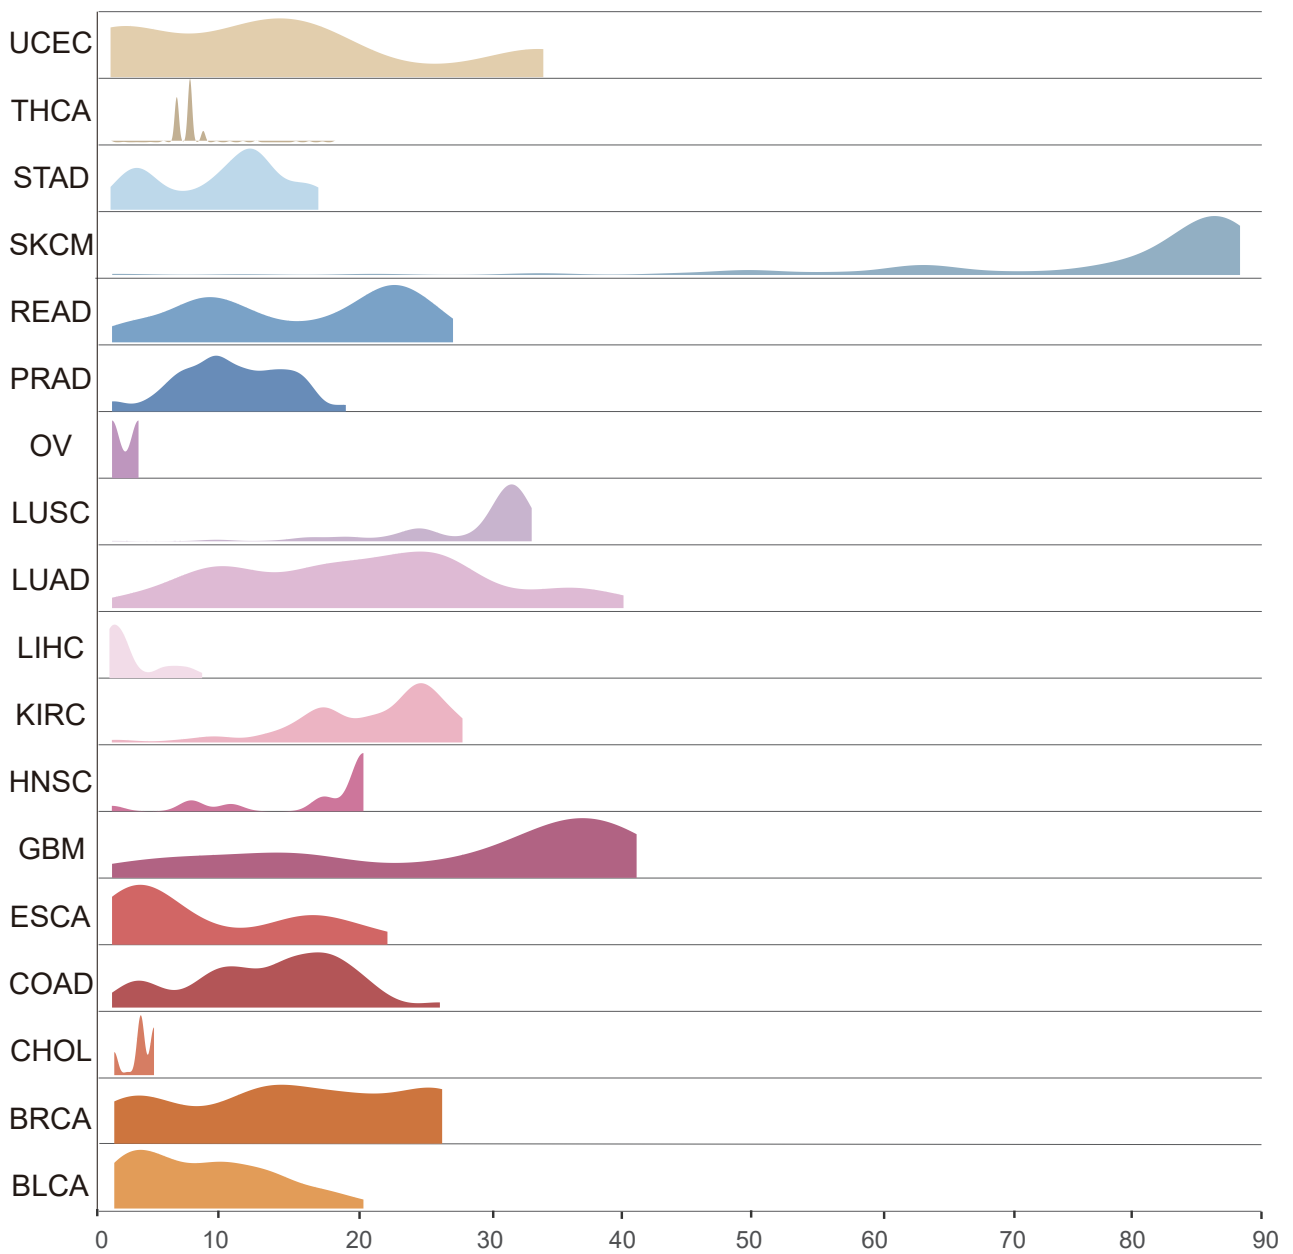

**Supplementary Figure 2.** Distribution of immune genes in ICP-LncCRCTs across all cancers, with different colors representing different cancers.

### Supplementary Figure 3

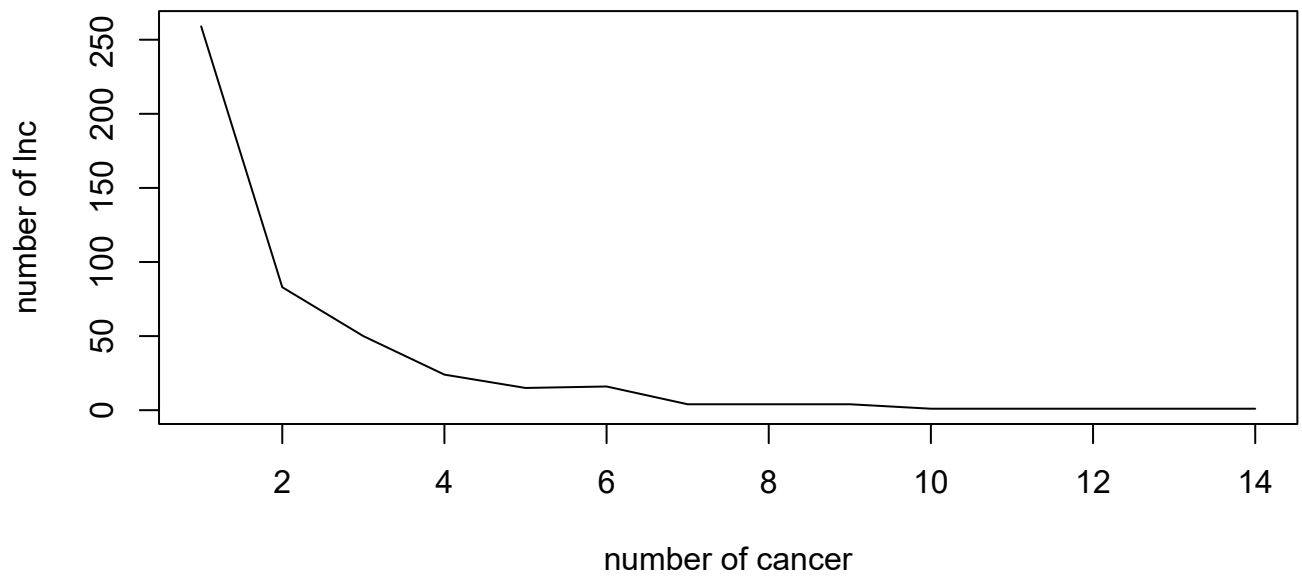

**Supplementary Figure 3.** The numbers of common lncRNAs are similar when five to 6~14 are changed.

## Supplementary Figure 4

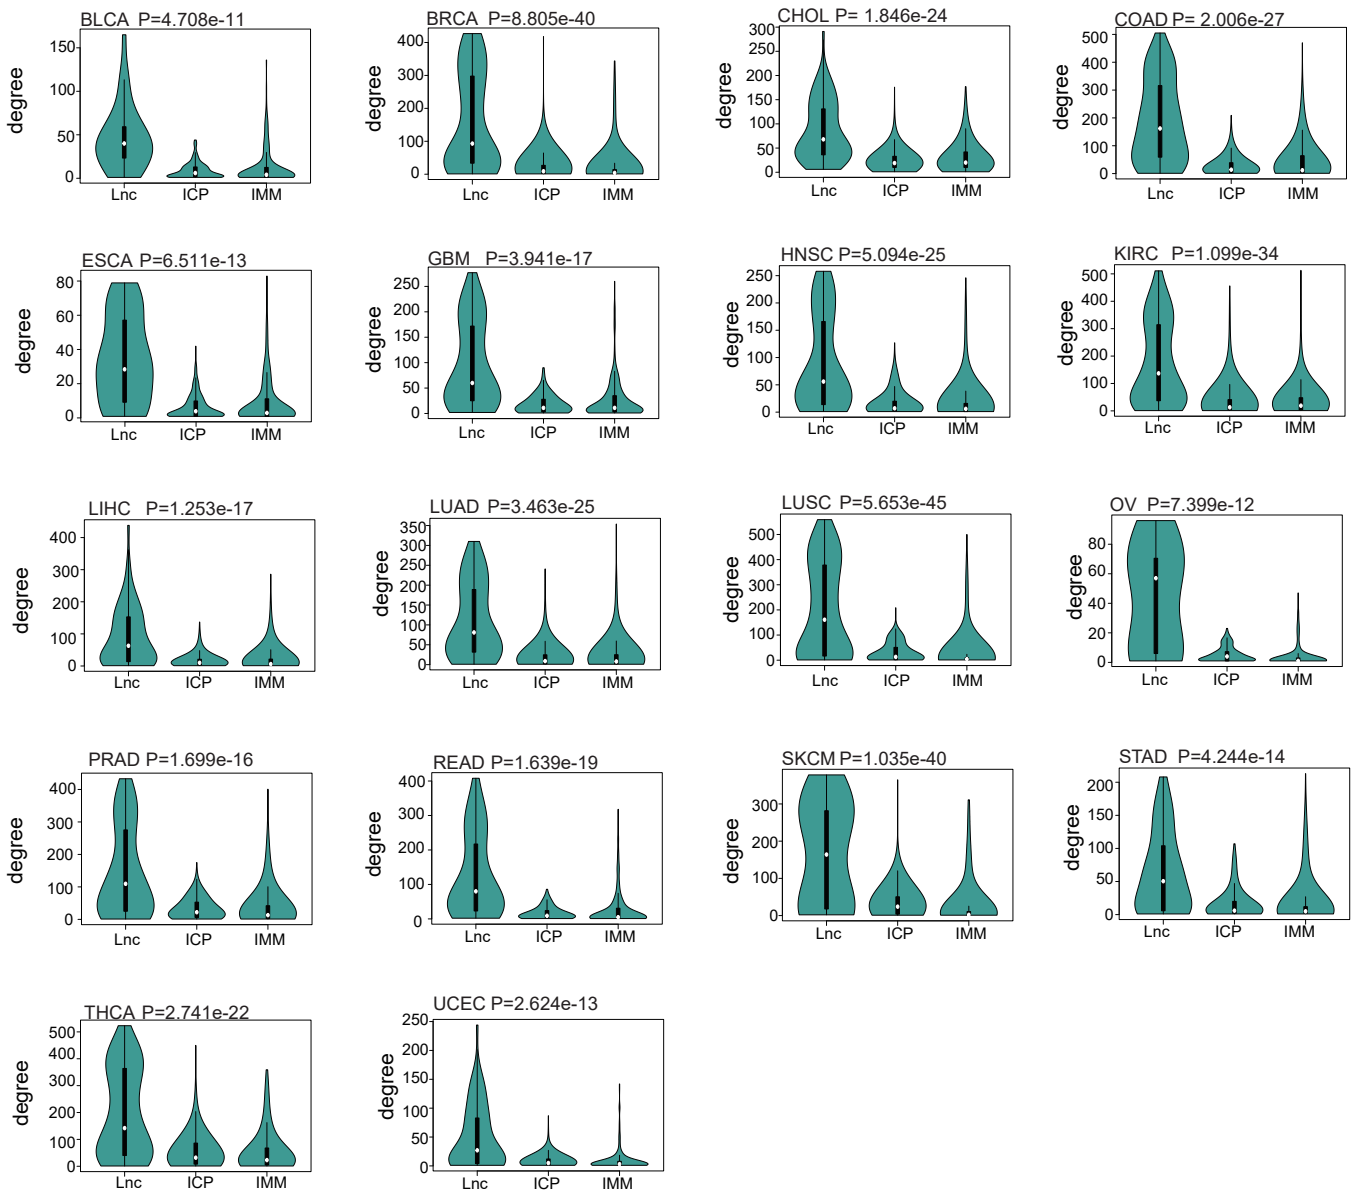

**Supplementary Figure 4.** Degree distributions of lncRNA, ICP and IMM in the ICP-LncCRCTs network. P-values for the K-W test are at the upper left. Black boxes indicate the interquartile range of the data. White dots indicate the median. Black vertical lines indicate 95% confidence intervals. The width of the violin plot indicates the density of the data.

## Supplementary Figure 5

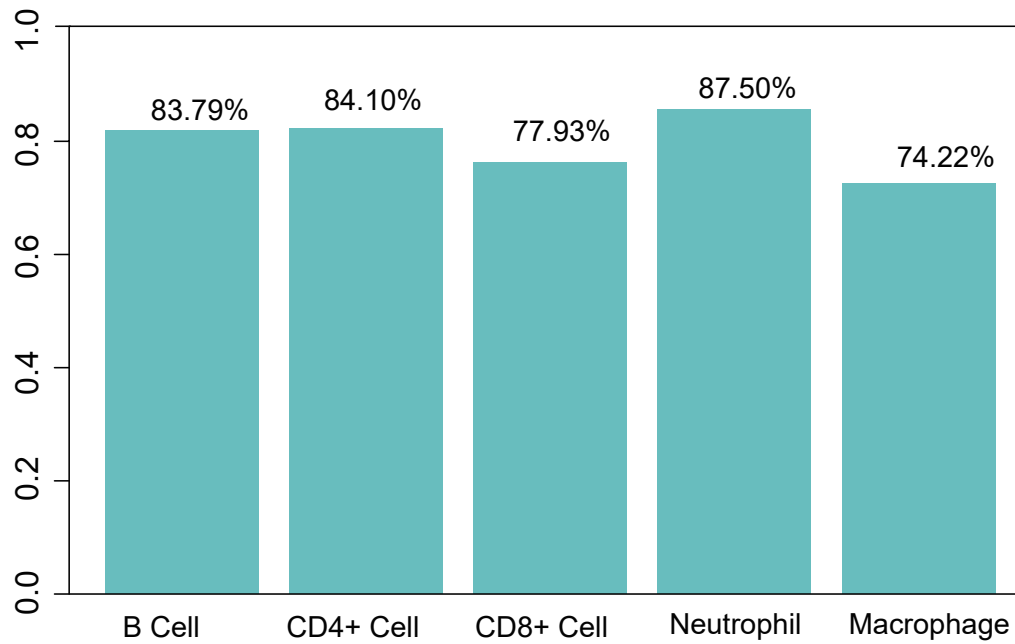

**Supplementary Figure 5.** The vast majority of ICP-related lncRNAs are associated with immune infiltration. The bar graph demonstrates the proportion of ICP-related lncRNAs associated with infiltration to all ICP-related lncRNAs in the five immune cell types.

## Supplementary Figure 6

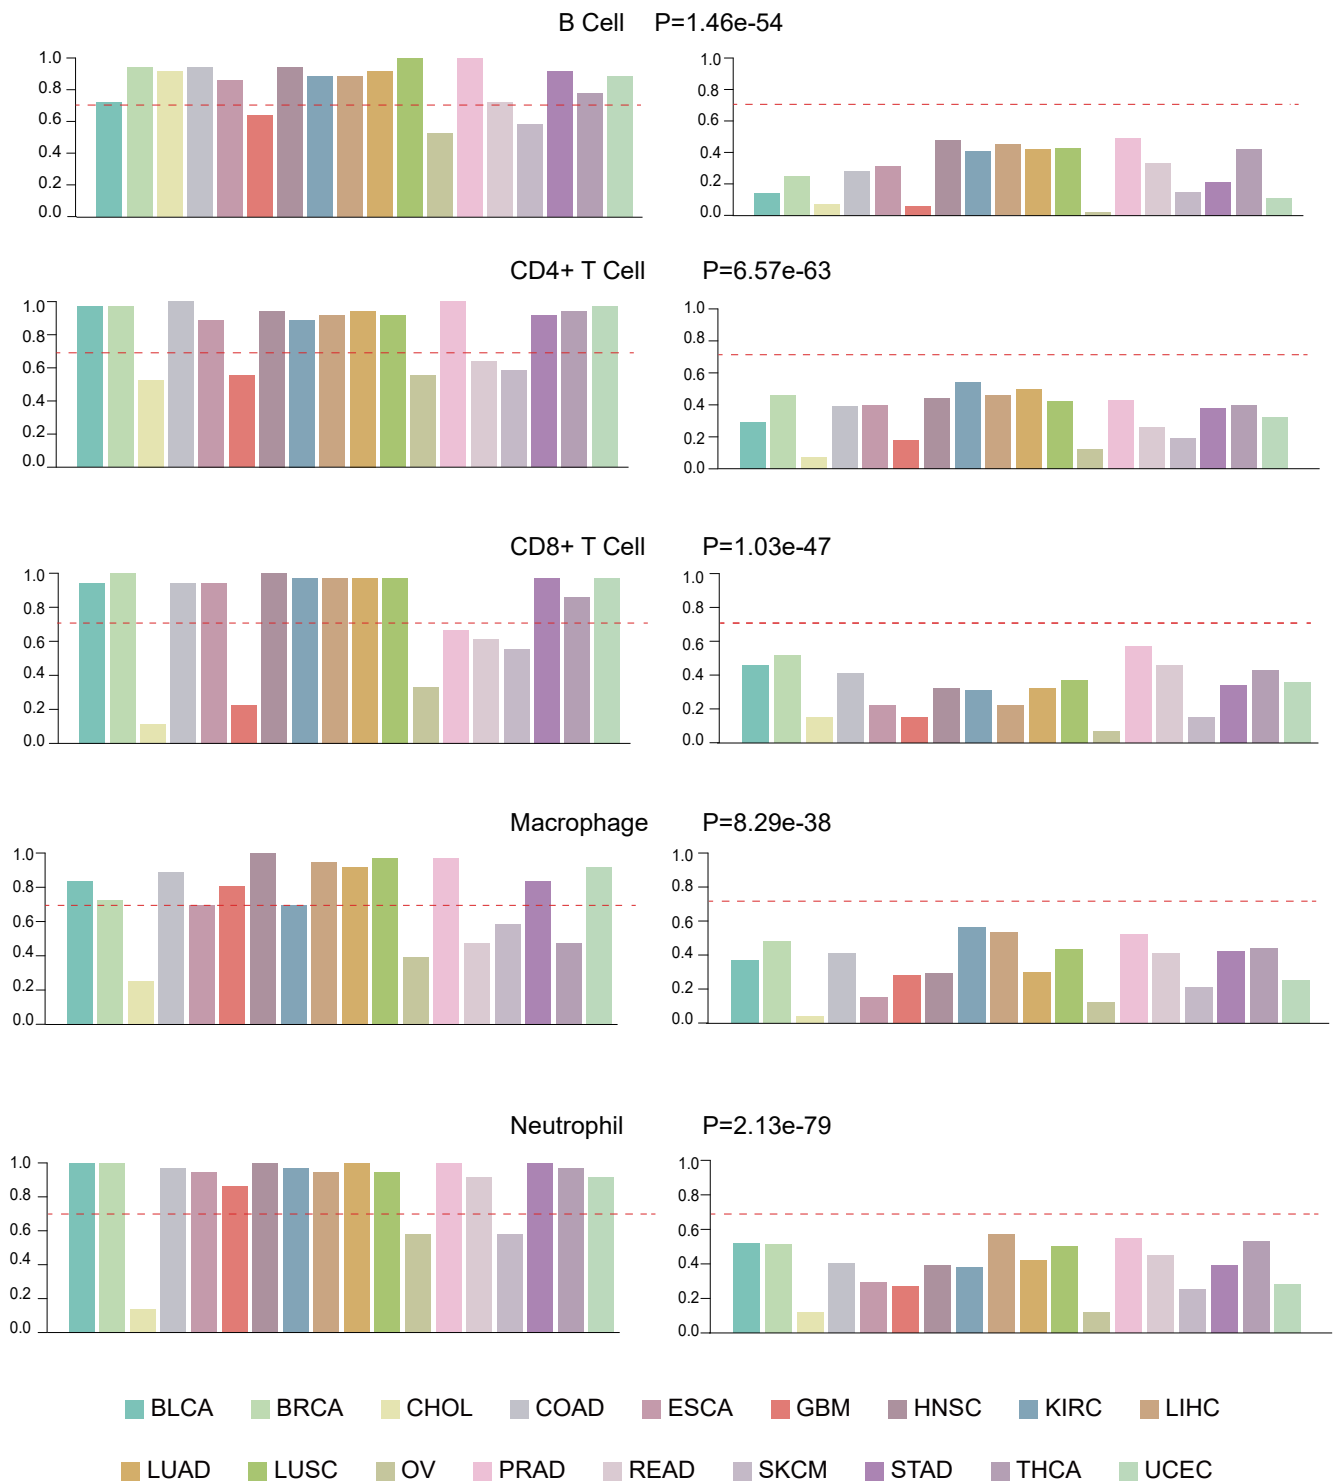

**Supplementary Figure 6.** Comparison of immune infiltration correlation of common ICP-related lncRNAs with other lncRNAs. Different colors represent different types of cancer.

## Supplementary Figure 7

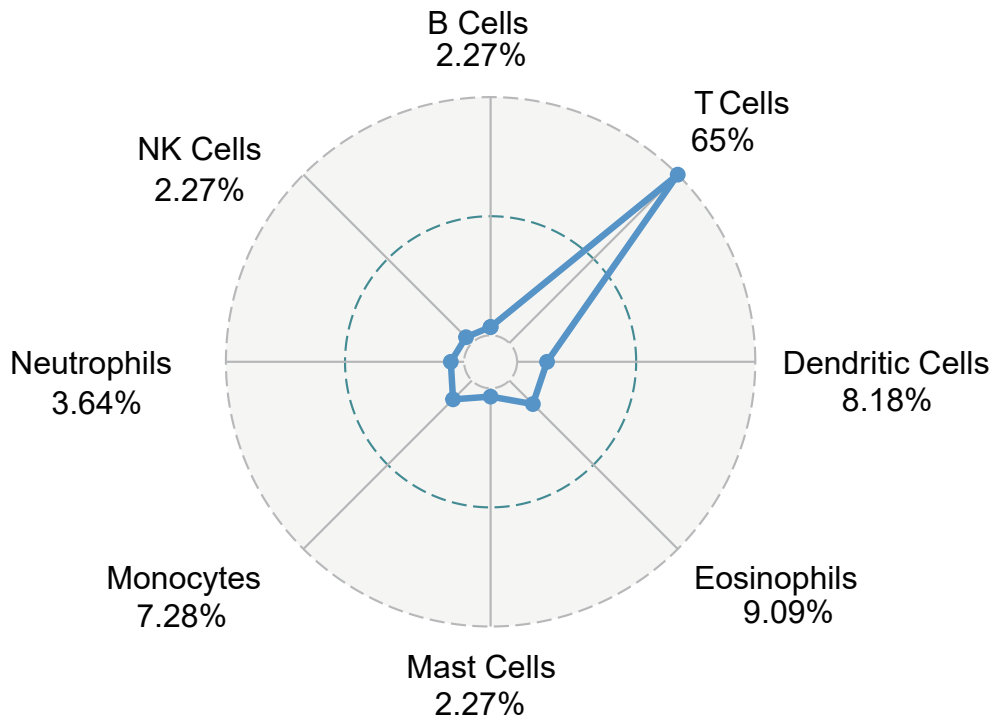

**Supplementary Figure 7.** Radar plots indicate the proportion of highly expressed ICP-related lncRNAs in different cells.

## Supplementary Figure 8

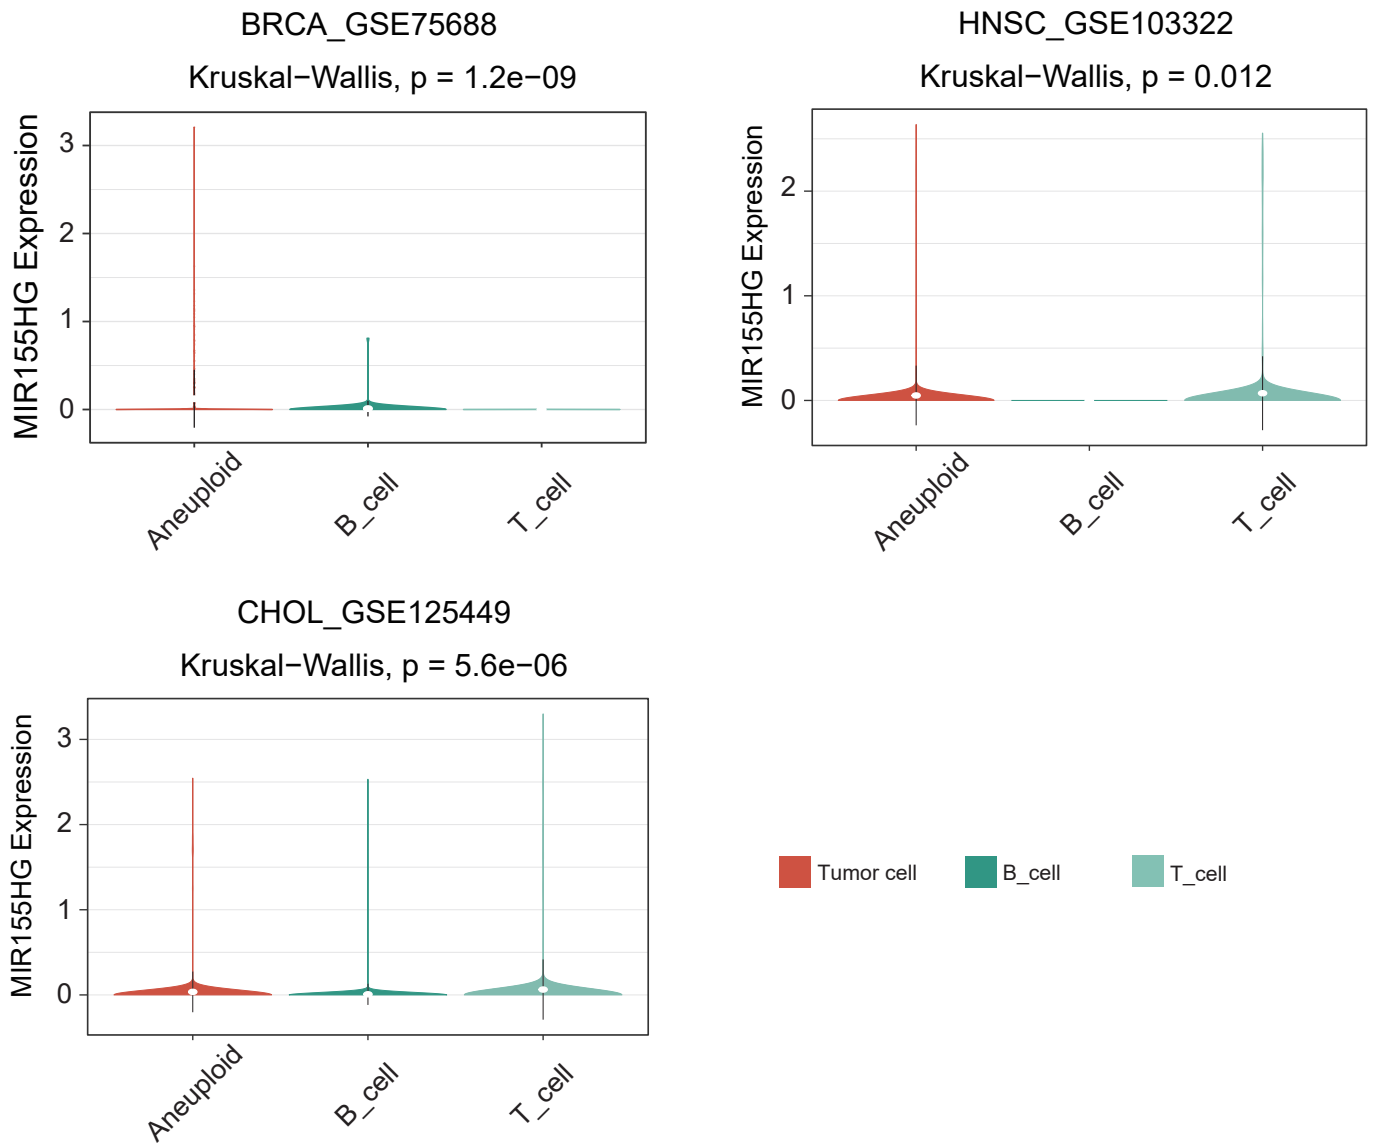

**Supplementary Figure 8.** Violins indicate the differential expression of MIR155HG in different types of immune cells in the GSE75688, GSE125449 and GSE103322 datasets. White dots indicate the median. Black vertical lines indicate 95% confidence intervals. The width of the violin plot indicates the density of the data.



## Supplementary Figure 9

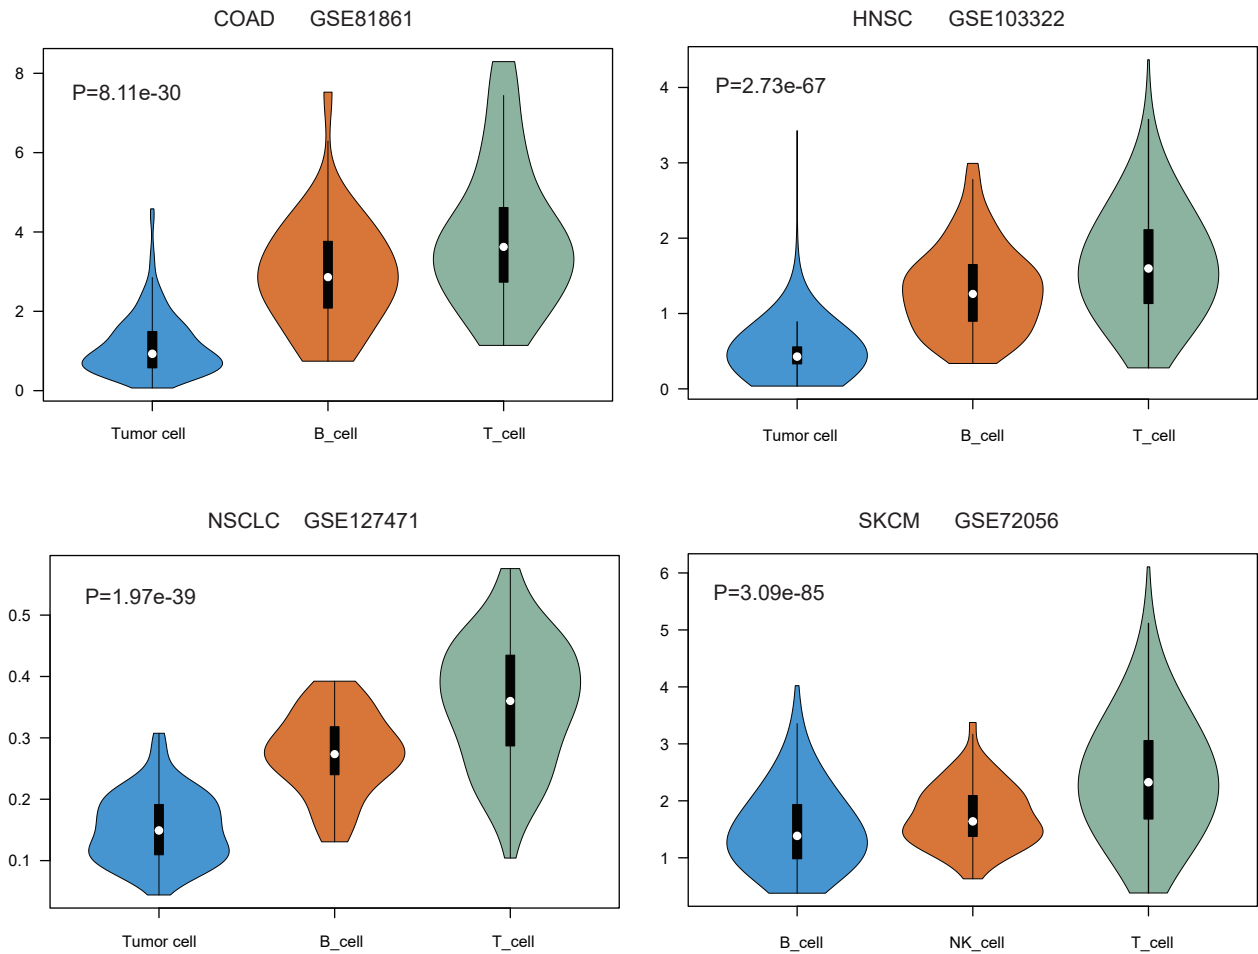

**Supplementary Figure 9.** Violins indicate the differential expression of lncRNA-ICP relationship pairs between different cell types in different single-cell datasets. Black boxes indicate the interquartile range of the data. White dots indicate the median. Black vertical lines indicate 95% confidence intervals. The width of the violin plot indicates the density of the data.

## Supplementary Figure 10

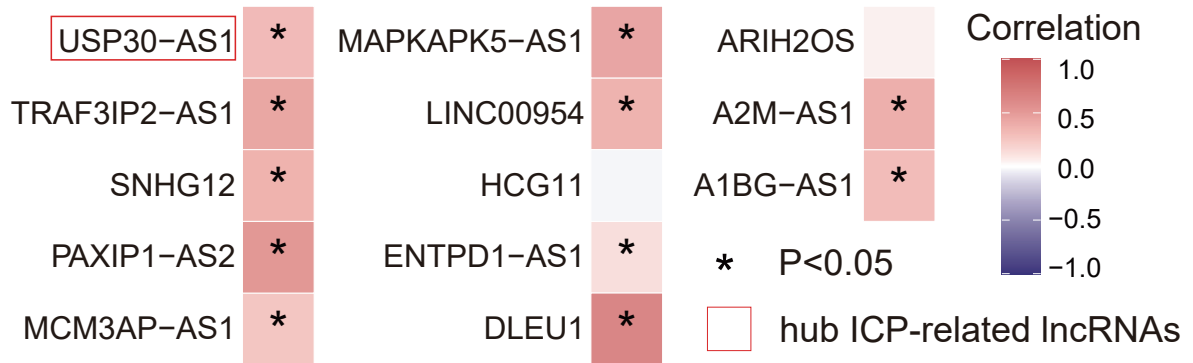

**Supplementary Figure 10.** Common ICP-related lncRNAs clustered with MIR155HG show a close co-expression. Correlation is assessed using the Pearson correlation coefficient.

## Supplementary Figure 11

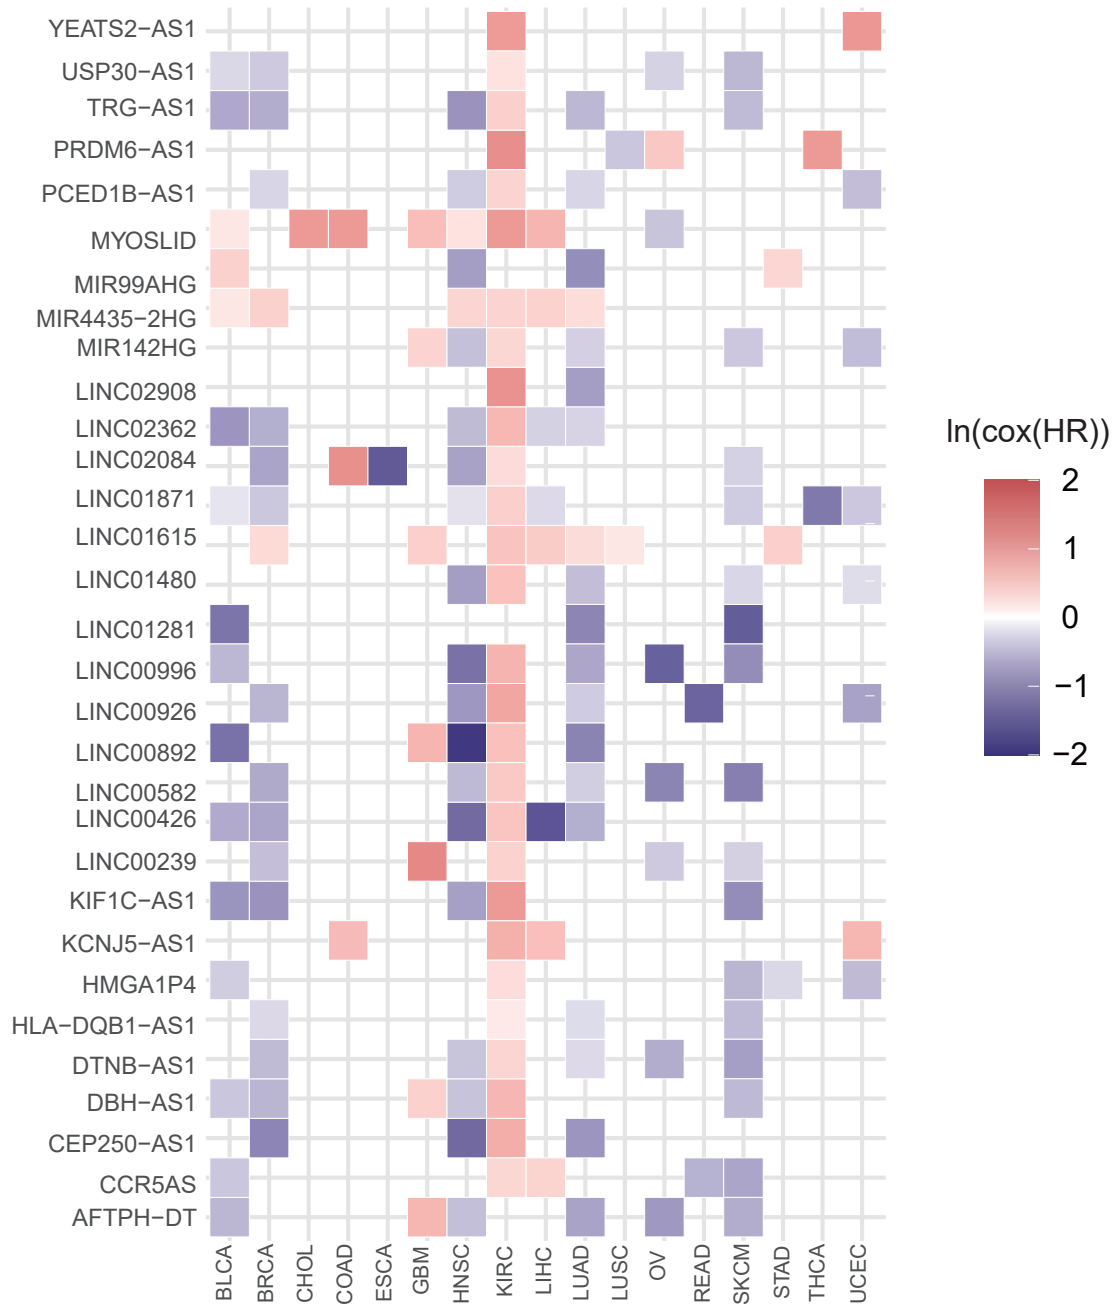

**Supplementary Figure 11.** Prognosis-related ICP-related lncRNAs. Shades of color indicate the strength of the correlation with prognosis.

## Supplementary Figure 12

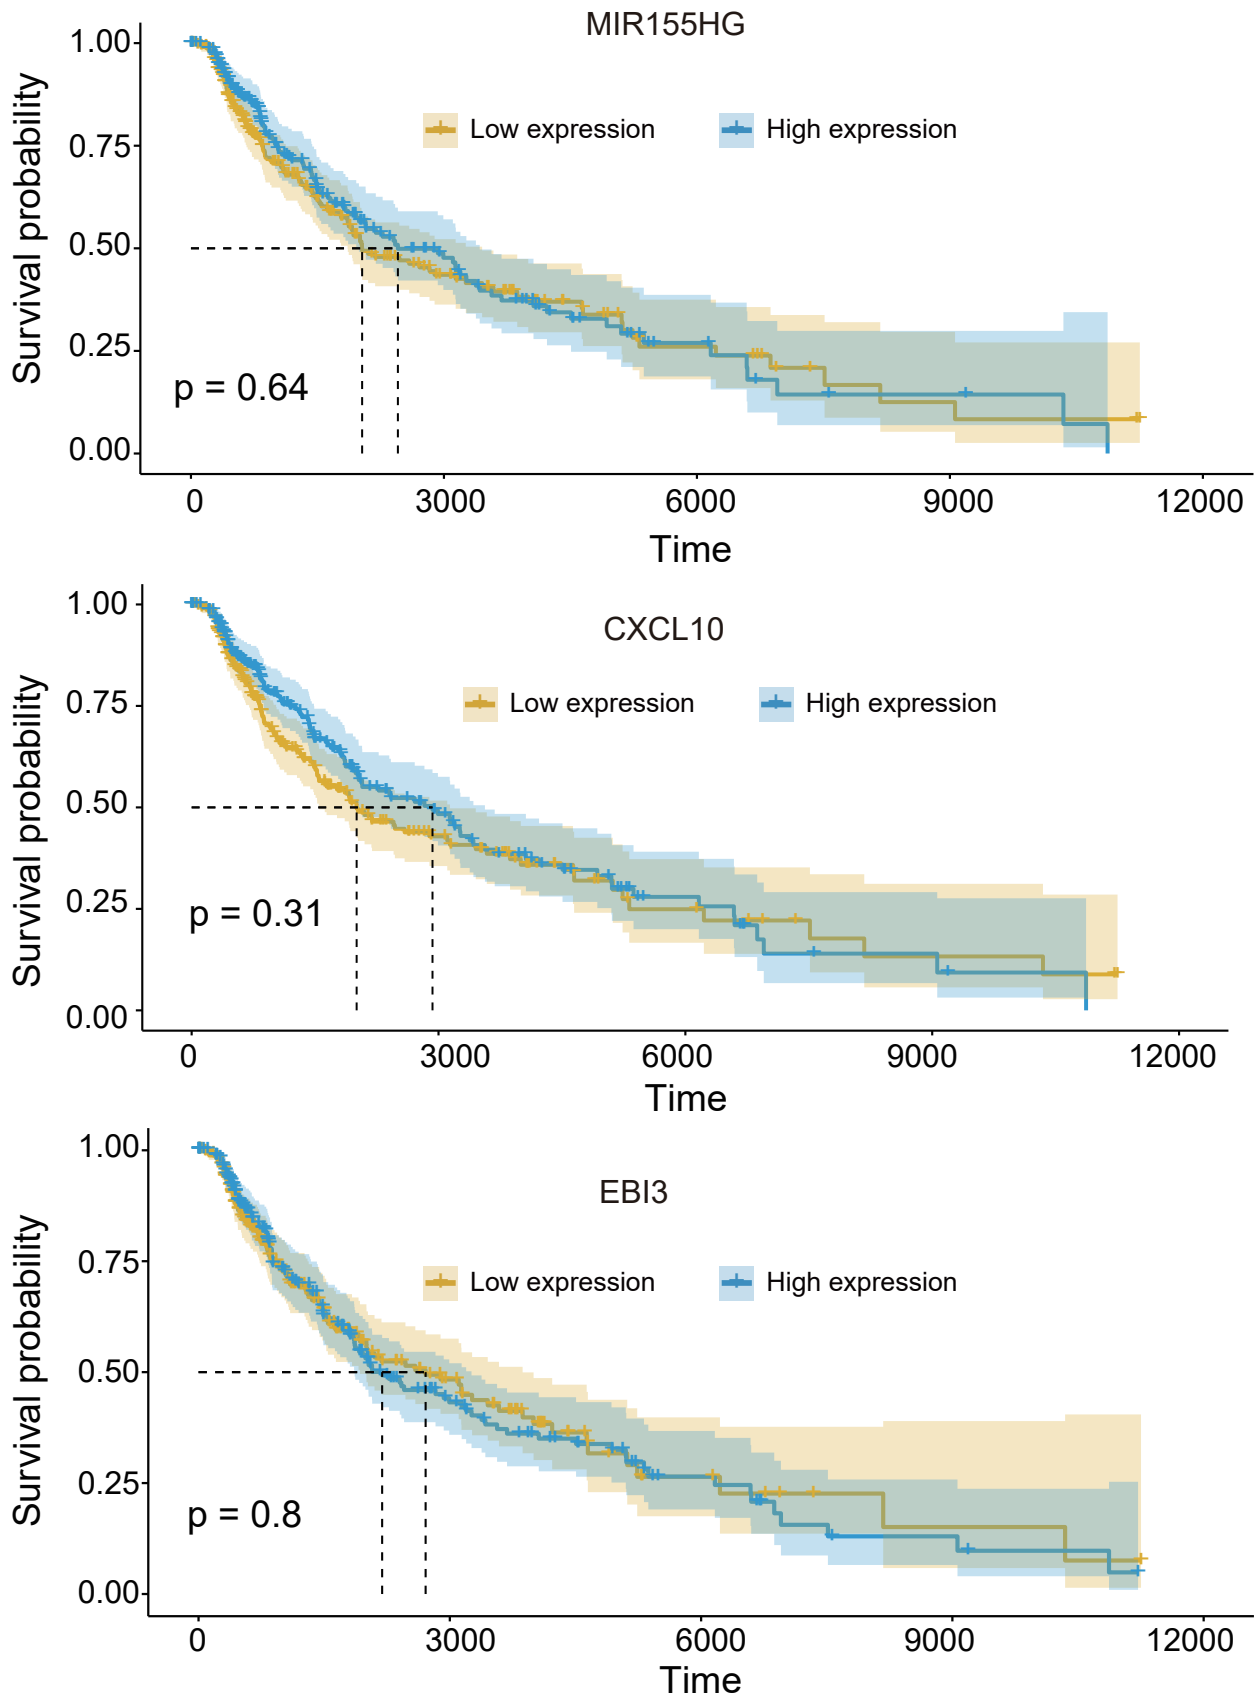

**Supplementary Figure 12.** KM curves of each gene in ICP-LncCRCT MIR155HG/CXCL10/EBI3. Solid blue lines indicate the high expression group and solid yellow lines indicate the low expression group. Shaded areas indicate 95% confidence intervals. Asterisks on the curves indicate censoring points.

## Supplementary Figure 13

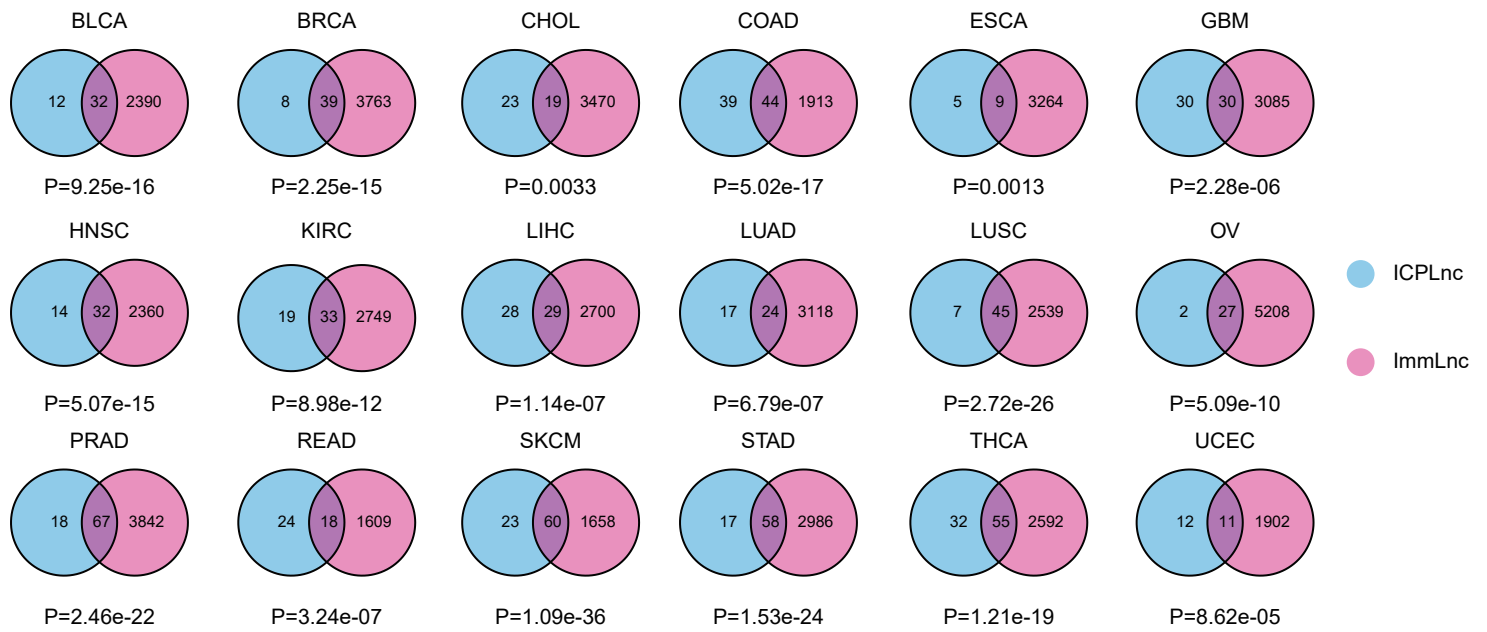

**Supplementary Figure 13.** Comparison of ICP-associated lnc with immune-associated lnc in ImmLnc work. P-values are calculated using the hypergeometric test with a background gene count of 13953.

## Supplementary Figure 14

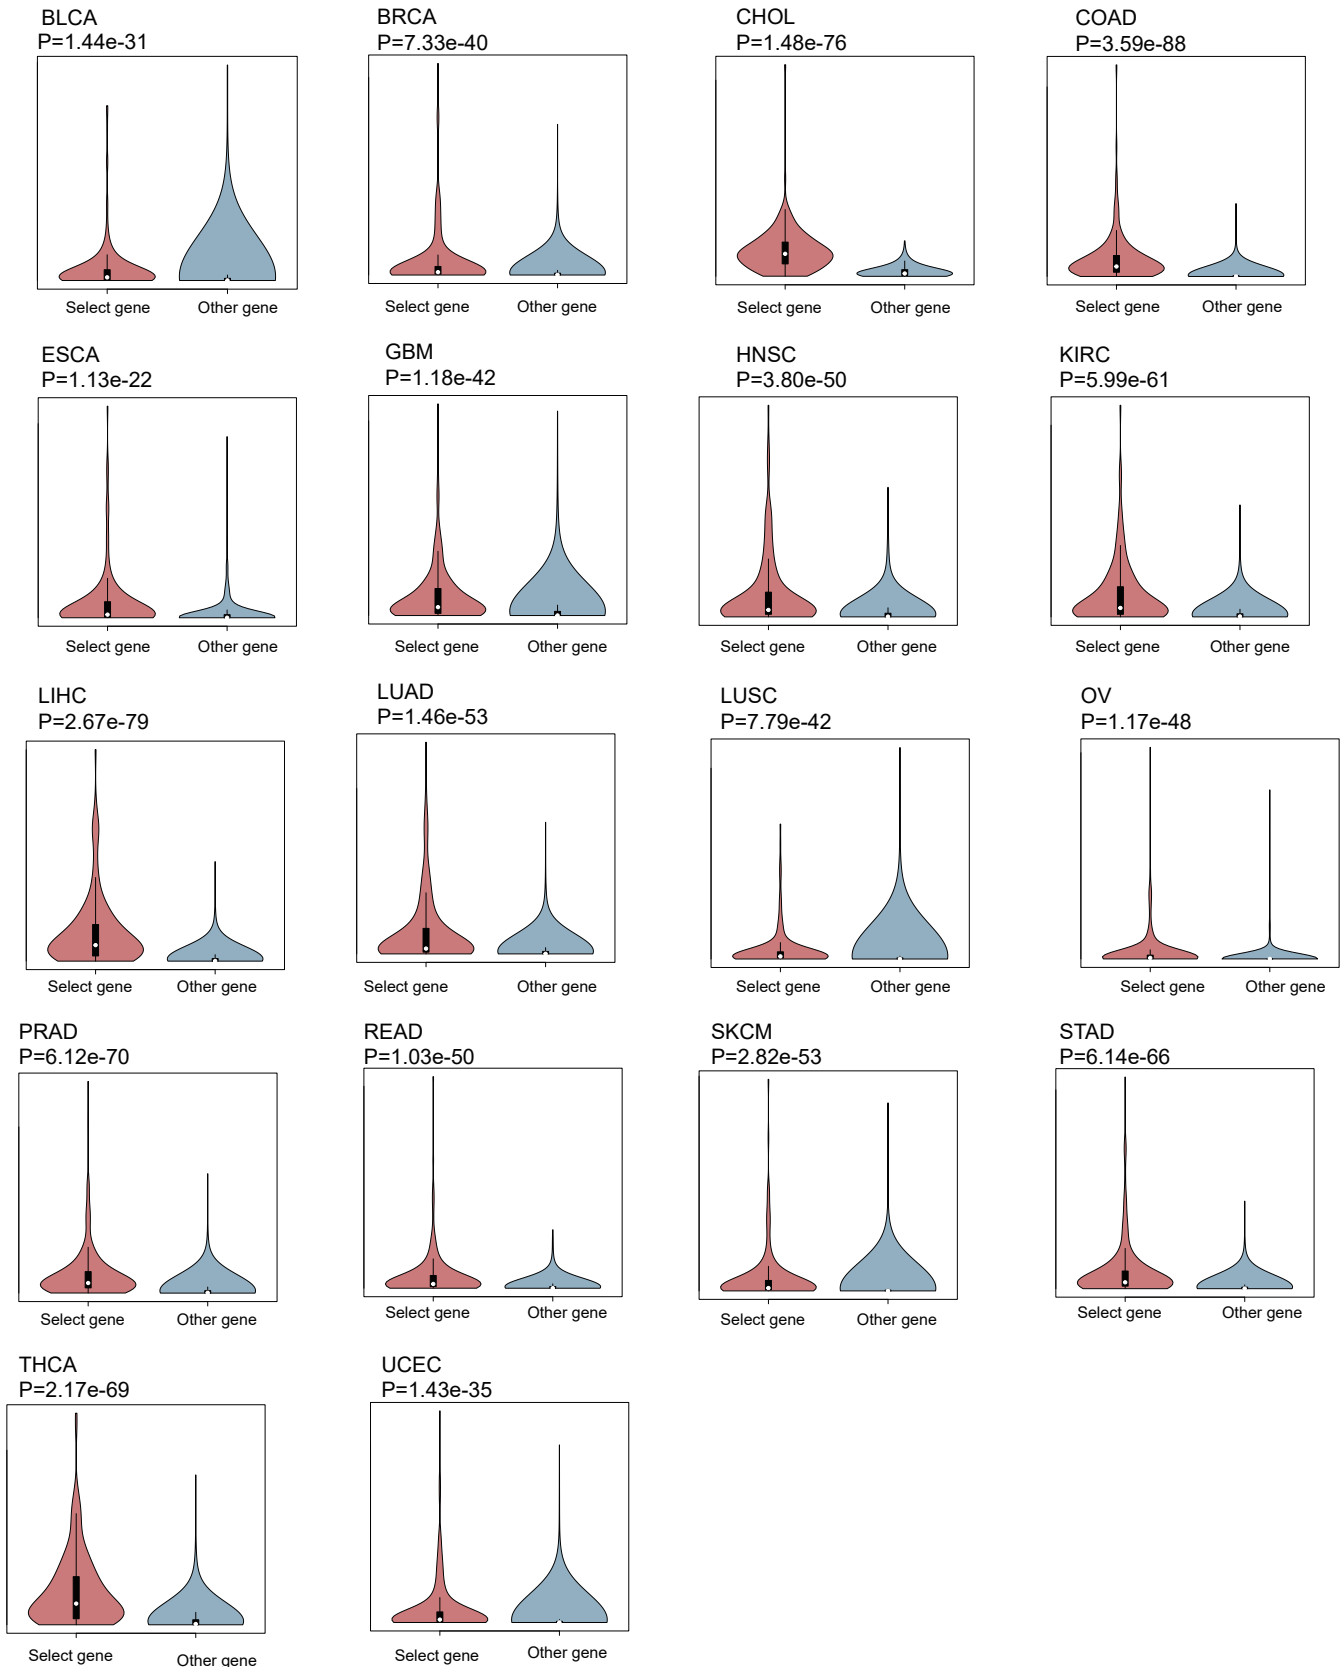

**Supplementary Figure 14.** The samples are divided into two groups according to tumor purity score, and their partial correlation is calculated, and the ANOVA is performed. Black boxes indicate the interquartile range of the data. White dots indicate the median. Black vertical lines indicate 95% confidence intervals. The width of the violin plot indicates the density of the data.

## Supplementary Figure 15

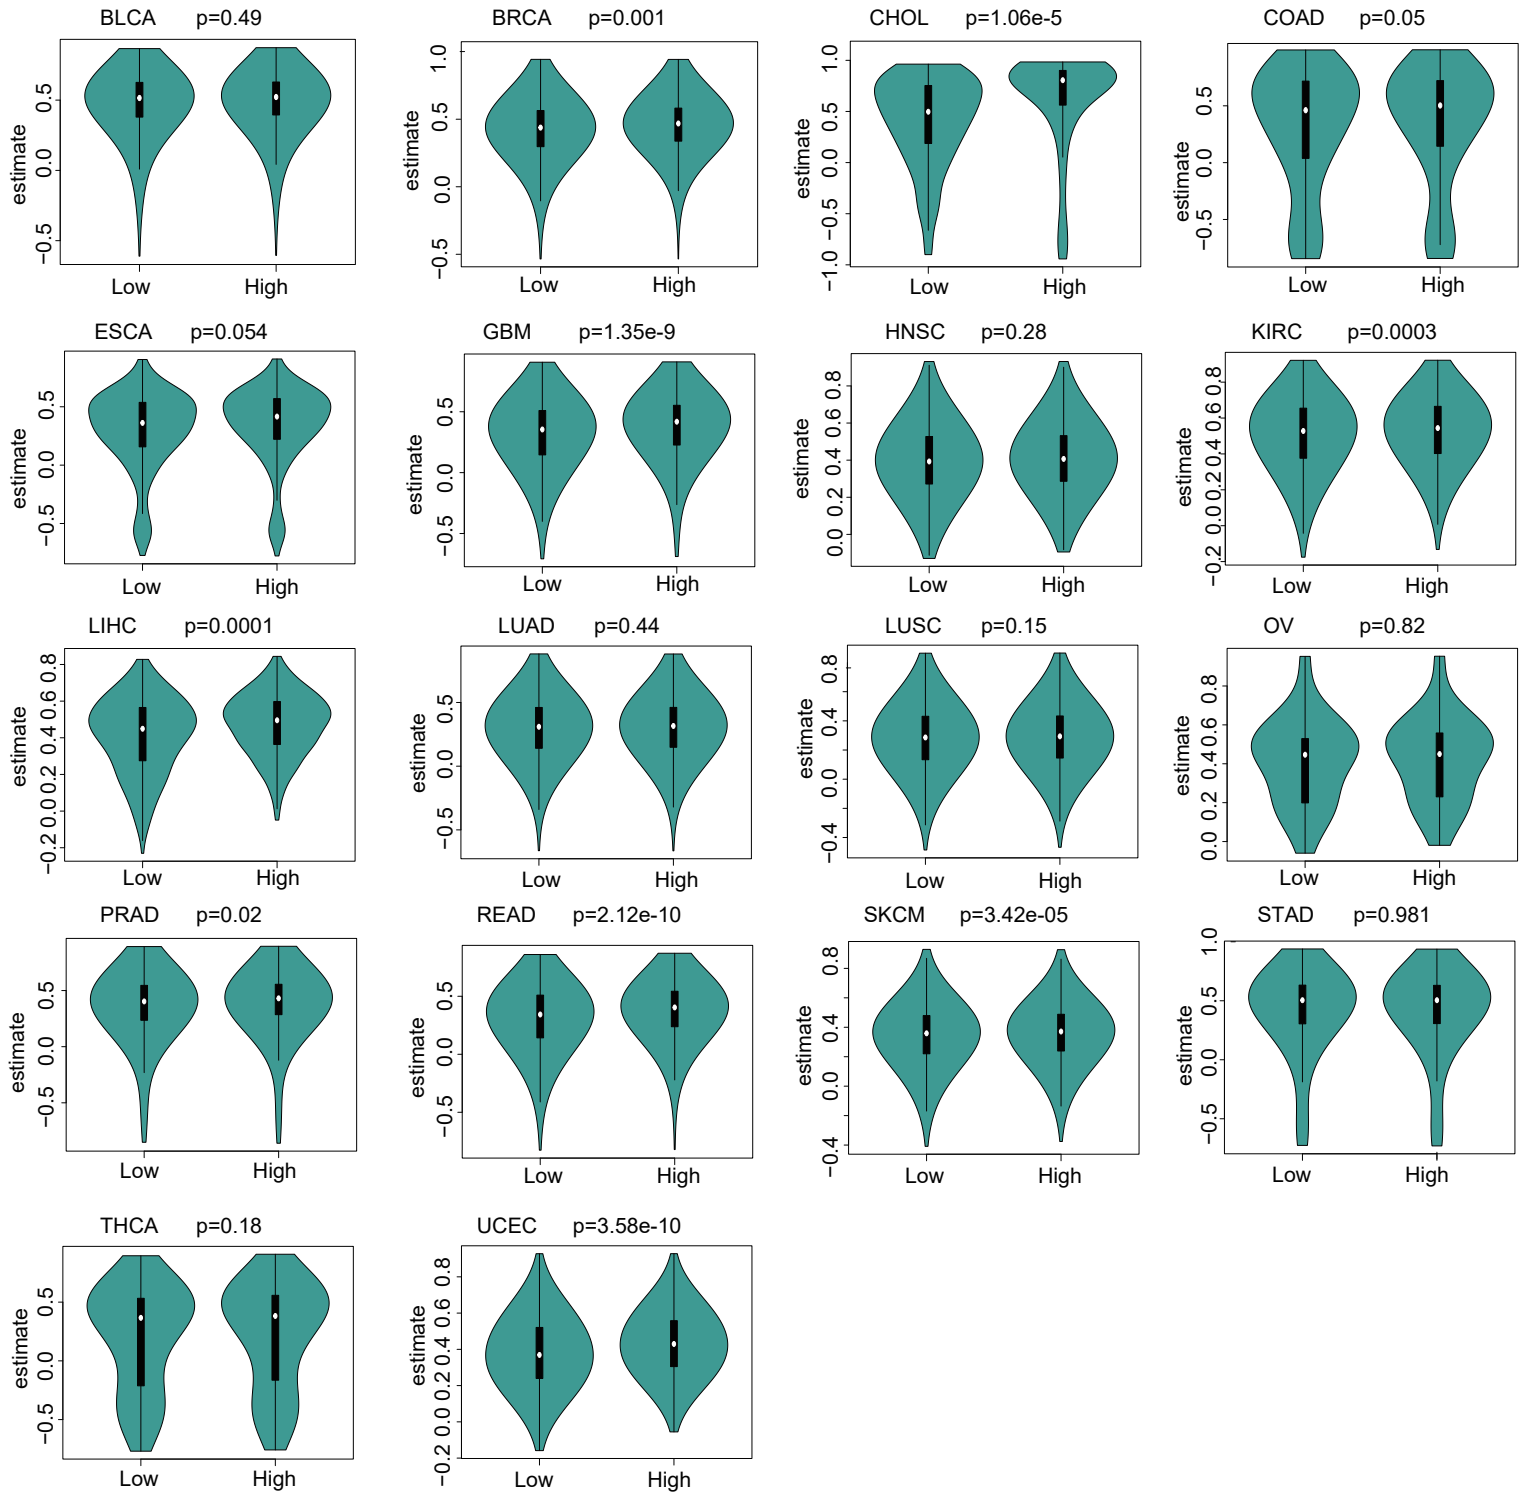

**Supplementary Figure 15.** Comparison of ICP-associated Inc with immune-associated Inc in ImmLnc work. P-values are calculated using the hypergeometric test with a background gene count of 13953. Black boxes indicate the interquartile range of the data. White dots indicate the median. Black vertical lines indicate 95% confidence intervals. The width of the violin plot indicates the density of the data.

**Supplementary Table 1. Dataset sources and sample size statistics**

| TCGA | Detail                                | Num  | GTEX  | Num |
|------|---------------------------------------|------|-------|-----|
| BLCA | Bladder Urothelial                    | 430  |       |     |
| BRCA | Breast invasive carcinoma             | 1217 |       |     |
| CHOL | Cholangiocarcinoma                    | 45   |       |     |
| COAD | Colon adenocarcinoma                  | 512  |       |     |
| ESCA | Esophageal carcinoma                  | 173  |       |     |
| GBM  | Glioblastoma multiforme               | 173  |       |     |
| HNSC | Head and Neck squamous cell carcinoma | 547  |       |     |
| KIRC | Kidney renal clear cell carcinoma     | 607  |       |     |
| LIHC | Liver hepatocellular carcinoma        | 424  |       |     |
| LUAD | Lung adenocarcinoma                   | 585  |       |     |
| LUSC | Lung squamous cell carcinoma          | 550  |       |     |
| OV   | Ovarian serous cystadenocarcinoma     | 379  | Ovary | 89  |
| PRAD | Pancreatic adenocarcinoma             | 551  |       |     |
| READ | Rectum adenocarcinoma                 | 177  |       |     |
| SKCM | Skin Cutaneous Melanoma               | 472  | Skin  | 234 |
| STAD | Stomach adenocarcinoma                | 407  |       |     |
| THCA | Thyroid carcinoma                     | 569  |       |     |
| UCEC | Uterine Corpus Endometrial Carcinoma  | 583  |       |     |

**Supplementary Table 2. Independent dataset for validation**

| Dataset | Detail                              | Source |
|---------|-------------------------------------|--------|
| GBM-325 | Glioblastoma multiforme             | CGGA   |
| PRAD-FR | Pancreatic adenocarcinoma in France | ICGC   |

**Supplementary Table 3. Single-cell datasets**

| Dataset        | Cancer Type | Number of cell |
|----------------|-------------|----------------|
| GSE127471      | NSCLC       | 1443           |
| GSE117570      | NSCLC       | 1931           |
| GSE69405       | LUAD        | 208            |
| GSE75688       | BRCA        | 563            |
| GSE118389      | BRCA        | 1534           |
| GSE125449_set2 | CHOL        | 4831           |
| GSE81861       | COAD        | 590            |
| GSE103322      | HNSC        | 5902           |
| GSE125449_set1 | LIHC        | 5115           |
| GSE72056       | SKCM        | 2840           |

**Supplementary Table 4. Dataset used for ICB response analysis**

| Cohort                         | Treatment        | Sample | Responder | Non-responder | PMID     |
|--------------------------------|------------------|--------|-----------|---------------|----------|
| Gide et al. <sup>1</sup>       | anti-CTLA-4+PD-1 | 32     | 21        | 11            | 30753825 |
| Gide et al. <sup>1</sup>       | anti-PD-1        | 41     | 19        | 22            | 30753825 |
| Van Allen et al. <sup>2</sup>  | anti-CTLA-4      | 37     | 14        | 23            | 26359337 |
| Riaz et al.-Naive <sup>3</sup> | anti-PD-1        | 25     | 6         | 19            | 29033130 |
| Riaz et al.-Prog <sup>3</sup>  | anti-PD-1        | 26     | 4         | 22            | 29033130 |

**Supplementary References**

- 1 Gide, T. N. , Quek, C. , Menzies, A. M., et al. Distinct Immune Cell Populations Define Response to Anti-PD-1 Monotherapy and Anti-PD-1/Anti-CTLA-4 Combined Therapy. *Cancer Cell* 35, 238-255 e236. <https://www.ncbi.nlm.nih.gov/pubmed/30753825> (2019).
- 2 Van Allen, E. M. , Miao, D. , Schilling, B., et al. Genomic correlates of response to CTLA-4 blockade in metastatic melanoma. *Science* 350, 207-211. <https://www.ncbi.nlm.nih.gov/pubmed/26359337> (2015).
- 3 Riaz, N. , Havel, J. J. , Makarov, V., et al. Tumor and Microenvironment Evolution during Immunotherapy with Nivolumab. *Cell* 171, 934-949 e916. <https://www.ncbi.nlm.nih.gov/pubmed/29033130> (2017).
