# Supplementary material for: The landscape of immune checkpoint-related long non-coding RNAs core regulatory circuitry reveals implications for immunoregulation and immunotherapy responses
Source: PubMed Central journal article supplement (PMC10940638; doi:10.1038/s42003-024-06004-z), 2024-03-14
Supplement: 42003_2024_6004_MOESM2_ESM.pdf [file 42003_2024_6004_MOESM2_ESM.pdf]

## **Description of Additional Supplementary Files**

**File name:** Supplementary Data 1

**Description:** The source data behind the Figure 1-5 in the paper.

**File name:** Supplementary Data 2

**Description:** The source data behind the Figure 6-7 in the paper.
